# Supplementary material for: Genome-wide Identification of TCP Family Transcription Factors from Populus euphratica and Their Involvement in Leaf Shape Regulation
Source: PubMed Central journal article supplement (PMC5015053; doi:10.1038/srep32795), 2016-09-08
Supplement: srep32795-s1.pdf [file srep32795-s1.pdf]

**Genome-wide Identification of TCP Family Transcription Factors from *Populus euphratica* and Their Involvement in Leaf Shape Regulation**

Xiaodong Ma<sup>a,b,c</sup>, Jianchao Ma<sup>d</sup>, Di Fan<sup>e</sup>, Chaofeng Li<sup>a,c</sup>, Yuanzhong Jiang<sup>e</sup> and Keming Luo<sup>a, e\*</sup>

<sup>a</sup> Key Laboratory of Adaptation and Evolution of Plateau Biota, Northwest Institute of Plateau Biology, Chinese Academy of Sciences, Xining, 810008, China

<sup>b</sup> School of Chemistry and Chemical Engineering, Qinghai University for Nationalities, Xining, 810007, China

<sup>c</sup> University of the Chinese Academy of Sciences, Beijing, 100049 China

<sup>d</sup> State Key Laboratory of Grassland Agro-Ecosystem, School of Life Science, Lanzhou University, Lanzhou, China

<sup>e</sup> School of Life Science, Southwest University, Chongqing, 400715 China

\* Corresponding author: Keming Luo, [kemingl@swu.edu.cn](mailto:kemingl@swu.edu.cn).

**Supplementary Table S1 TCP genes identified in *Populus trichocarpa* genome.**

| Name             | Gene ID            | Chromosome location                | Exon/Intron number | Size/aa | Molecular weight | Isoelectric point |
|------------------|--------------------|------------------------------------|--------------------|---------|------------------|-------------------|
| <b>P</b> trTCP1  | Potri.001G060000.1 | Chr01:4606886..4608711 forward     | 1/0                | 302     | 32824.1          | 9.12              |
| <b>P</b> trTCP2  | Potri.001G111800.1 | Chr01:8915776..8918193 forward     | 1/0                | 397     | 41566.69         | 5.92              |
| <b>P</b> trTCP3  | Potri.001G327100.1 | Chr01:33128474..33130288 reverse   | 1/0                | 320     | 33881.91         | 8.99              |
| <b>P</b> trTCP4  | Potri.001G375800.1 | Chr01:39070007..39073153 reverse   | 1/0                | 413     | 45260.12         | 6.27              |
| <b>P</b> trTCP5  | Potri.002G152200.1 | Chr02:11505495..11507288 reverse   | 1/0                | 348     | 37322.96         | 9.51              |
| <b>P</b> trTCP6  | Potri.003G120200.1 | Chr03:14262872..14264067 reverse   | 4/3                | 287     | 30513.49         | 6.52              |
| <b>P</b> trTCP7  | Potri.003G167900.1 | Chr03:17835407..17836527 reverse   | 1/0                | 302     | 32569.92         | 6.23              |
| <b>P</b> trTCP8  | Potri.004G046300.1 | Chr04:3514571..3516334 forward     | 1/0                | 395     | 42703.64         | 7                 |
| <b>P</b> trTCP9  | Potri.004G065800.5 | Chr04:5518337..5526108 forward     | 1/0                | 473     | 51719.14         | 7.88              |
| <b>P</b> trTCP10 | Potri.004G116100.1 | Chr04:10737586..10740883 forward   | 1/0                | 365     | 40352.07         | 7.19              |
| <b>P</b> trTCP11 | Potri.004G222100.1 | Chr04:22846150..22848314 forward   | 1/0                | 581     | 61311.54         | 6.74              |
| <b>P</b> trTCP12 | Potri.005G090300.2 | Chr05:6716502..6718585 reverse     | 1/0                | 272     | 27682.92         | 9.72              |
| <b>P</b> trTCP13 | Potri.005G140600.1 | Chr05:11788531..11788653 forward   | 1/0                | 41      | 4787.43          | 9.62              |
| <b>P</b> trTCP14 | Potri.006G125800.1 | Chr06:10151379..10152438 forward   | 1/0                | 198     | 21310.74         | 6.5               |
| <b>P</b> trTCP15 | Potri.008G115800.1 | Chr08:7411585..7413806 reverse     | 1/0                | 453     | 50789.88         | 6.58              |
| <b>P</b> trTCP16 | Potri.009G009400.1 | Chr09:1695921..1696474 forward     | 1/0                | 178     | 19484.71         | 5.59              |
| <b>P</b> trTCP17 | Potri.010G130200.1 | Chr10:14537655..14539110 forward   | 1/0                | 472     | 52976.54         | 8.94              |
| <b>P</b> trTCP18 | Potri.011G055500.1 | Chr11:4839143..4841262 forward     | 2/1                | 459     | 49920.59         | 7.42              |
| <b>P</b> trTCP19 | Potri.011G083100.4 | Chr11:8357434..8364561 reverse     | 1/0                | 478     | 51623.06         | 7.76              |
| <b>P</b> trTCP20 | Potri.011G096600.2 | Chr11:11763733..11766342 reverse   | 1/0                | 408     | 44468.04         | 6.49              |
| <b>P</b> trTCP21 | Potri.012G059900.1 | Chr12:6319154..6321338 reverse     | 2/1                | 394     | 44959.21         | 8.6               |
| <b>P</b> trTCP22 | Potri.012G135900.1 | Chr12:15188758..15189871 forward   | 1/0                | 357     | 38078.04         | 6.9               |
| <b>P</b> trTCP23 | Potri.013G110700.1 | Chr13:12370950..12373420 reverse   | 1/0                | 415     | 44095.33         | 7.2               |
| <b>P</b> trTCP24 | Potri.013G119400.1 | Chr13:13248572..13251015 forward   | 1/0                | 345     | 38049.44         | 5.94              |
| <b>P</b> trTCP25 | Potri.014G078500.1 | Chr14:6307930..6309239 forward     | 2/1                | 396     | 42892.04         | 9.58              |
| <b>P</b> trTCP26 | Potri.015G050500.1 | Chr15:5563400..5565125 forward     | 2/1                | 402     | 46041.59         | 6.35              |
| <b>P</b> trTCP27 | Potri.015G058800.1 | Chr15:8042378..8044079 forward     | 1/0                | 377     | 41264.43         | 7.77              |
| <b>P</b> trTCP28 | Potri.015G138200.1 | Chr15:14686905..14687993 forward   | 2/1                | 327     | 35283.41         | 6.09              |
| <b>P</b> trTCP29 | Potri.016G074200.1 | Chr16:5609370..5611923 forward     | 5/4                | 445     | 47611.13         | 5.97              |
| <b>P</b> trTCP30 | Potri.016G094800.1 | Chr16:8490852..8492588 reverse     | 1/0                | 200     | 21540.81         | 9.38              |
| <b>P</b> trTCP31 | Potri.017G094800.1 | Chr17:11175983..11178060 forward   | 2/1                | 333     | 36837.37         | 7.19              |
| <b>P</b> trTCP32 | Potri.017G112000.1 | Chr17:12758702..12760734 reverse   | 2/1                | 374     | 42177.97         | 9.31              |
| <b>P</b> trTCP33 | Potri.019G081800.1 | Chr19:11505280..11507506 reverse   | 1/0                | 417     | 44556.66         | 6.52              |
| <b>P</b> trTCP34 | Potri.019G091300.1 | Chr19:12229257..12232192 forward   | 1/0                | 346     | 38045.36         | 6.26              |
| <b>P</b> trTCP35 | Potri.T044100.1    | scaffold_41:210714..212429 forward | 1/0                | 321     | 34146.02         | 8.99              |
| <b>P</b> trTCP36 | Potri.T146100.1    | scaffold_457:7249..10019 reverse   | 1/0                | 364     | 40352.07         | 7.19              |

**Supplementary Table S2 TCP genes identified in *Populus euphratica* genome**

| Name     | Gene ID     | Exon/Intron number | Size/aa | Molecular weight | Isoelectric point |
|----------|-------------|--------------------|---------|------------------|-------------------|
| PeuTCP1  | CCG000586.1 | 2/1                | 426     | 48070.51         | 6.44              |
| PeuTCP2  | CCG001135.1 | 2/1                | 374     | 42259.97         | 9.32              |
| PeuTCP3  | CCG002481.1 | 1/0                | 476     | 52186.43         | 7.38              |
| PeuTCP4  | CCG002729.1 | 2/1                | 405     | 45962.78         | 8.24              |
| PeuTCP5  | CCG003334.1 | 1/0                | 271     | 27639.92         | 9.72              |
| PeuTCP6  | CCG005156.1 | 1/0                | 200     | 21374.82         | 9.38              |
| PeuTCP7  | CCG006044.1 | 1/0                | 360     | 38316.84         | 6.05              |
| PeuTCP8  | CCG006216.1 | 5/4                | 623     | 68064.55         | 7.07              |
| PeuTCP9  | CCG007195.1 | 1/0                | 312     | 33041.71         | 7.17              |
| PeuTCP10 | CCG007701.1 | 1/0                | 363     | 40361.95         | 7.74              |
| PeuTCP11 | CCG007964.1 | 1/0                | 414     | 45293.21         | 6.46              |
| PeuTCP12 | CCG009717.1 | 1/0                | 320     | 33893.85         | 8.99              |
| PeuTCP13 | CCG010631.1 | 1/0                | 332     | 35489.13         | 9.96              |
| PeuTCP14 | CCG011685.1 | 1/0                | 478     | 51802.22         | 8.19              |
| PeuTCP15 | CCG012390.1 | 1/0                | 377     | 41285.37         | 6.39              |
| PeuTCP16 | CCG012899.1 | 1/0                | 346     | 38129.38         | 6.23              |
| PeuTCP17 | CCG013012.1 | 5/4                | 444     | 47806.3          | 5.84              |
| PeuTCP18 | CCG015462.1 | 3/2                | 350     | 38835.65         | 9.55              |
| PeuTCP19 | CCG018013.1 | 1/0                | 274     | 27955.01         | 9.51              |
| PeuTCP20 | CCG018118.1 | 1/0                | 176     | 19262.68         | 6.31              |
| PeuTCP21 | CCG019123.2 | 2/1                | 299     | 32062.04         | 9.15              |
| PeuTCP22 | CCG020734.1 | 1/0                | 278     | 30140.78         | 9.14              |
| PeuTCP23 | CCG021224.1 | 1/0                | 478     | 51819.21         | 8.19              |
| PeuTCP24 | CCG023727.1 | 1/0                | 199     | 21441.89         | 6.3               |
| PeuTCP25 | CCG024429.1 | 1/0                | 396     | 41441.54         | 5.71              |
| PeuTCP26 | CCG025130.1 | 1/0                | 472     | 52937.45         | 8.8               |
| PeuTCP27 | CCG026334.1 | 1/0                | 364     | 40420.12         | 7.21              |
| PeuTCP28 | CCG026357.1 | 1/0                | 414     | 43815.27         | 7.87              |
| PeuTCP29 | CCG026590.1 | 1/0                | 346     | 37988.42         | 6.09              |
| PeuTCP30 | CCG026656.1 | 1/0                | 417     | 44523.66         | 6.52              |
| PeuTCP31 | CCG028420.1 | 2/1                | 400     | 45920.55         | 7.08              |
| PeuTCP32 | CCG031555.1 | 1/0                | 278     | 29918.78         | 6.53              |
| PeuTCP33 | CCG032104.1 | 1/0                | 395     | 42646.71         | 6.9               |

**Supplementary Table S3 Primers used in qRT-PCR**

| Primer Name                  | Sequence (5'-3')        |
|------------------------------|-------------------------|
| <b><i>P. trichocarpa</i></b> |                         |
| PtrTCP1-qF                   | CCTGCCTCTGAGGACAAGAAA   |
| PtrTCP1-qR                   | TGACACAACACTCCCCAAT     |
| PtrTCP2-qF                   | CCACGCTGATCAAAATCGTAGG  |
| PtrTCP2-qR                   | ACCACACTACTGTTTCATGGCT  |
| PtrTCP3-qF                   | TCAAAGAGGAGTAGAGGACCCA  |
| PtrTCP3-qR                   | GCCCTTGGGATCCATGAACA    |
| PtrTCP4-qF                   | CAGCACCACACACCAGAAAT    |
| PtrTCP4-qR                   | TCTGTAGCGGTGGTAGTGGT    |
| PtrTCP5-qF                   | TTGTTAAGTGGGGCCTGCAT    |
| PtrTCP5-qR                   | CATTAGCAGGGACCACCACT    |
| PtrTCP6-qF                   | ATTGCTTGTCTGCTGCCGAC    |
| PtrTCP6-qR                   | CAAATATTGGAGCTGCGGTGG   |
| PtrTCP7-qF                   | ACAGTAAAGCGTACATCCCA    |
| PtrTCP7-qR                   | GAAAGGCAGAAAAGCACCTGT   |
| PtrTCP8-qF                   | TAAAGCTCGTCCAGCTCTTCC   |
| PtrTCP8-qR                   | ATAGGATACTGTGTCGAGGGG   |
| PtrTCP9-qF                   | AGCCTTGCTGCTGGTTTCAA    |
| PtrTCP9-qR                   | CGTTTGTGGTGGATCCGTCTA   |
| PtrTCP10-qF                  | TCACATGCCACAGCTCCAT     |
| PtrTCP10-qR                  | GTCCGGTGGACTTTCGCTAT    |
| PtrTCP11-qF                  | AACTCAAGAGCCCACCAAT     |
| PtrTCP11-qR                  | AGCCCATGAAAAGGACCTTGA   |
| PtrTCP12-qF                  | TTGTTTTTCGGGGTGCCTGT    |
| PtrTCP12-qR                  | CGCATAAGGCAATGGCACA     |
| PtrTCP13-qF                  | TACGACAACAACAAGACGC     |
| PtrTCP13-qR                  | AAATGGAAAGATCCCGGCAG    |
| PtrTCP14-qF                  | CCGTGTTACAGTGCAGGGTC    |
| PtrTCP14-qR                  | AGAAGCCACGAGGATTGAGG    |
| PtrTCP15-qF                  | TGCTCGGCTTCGATAAAGCA    |
| PtrTCP15-qR                  | CAAACACTCTTGCCGTCAGC    |
| PtrTCP16-qF                  | GAGATCGTCGTAICCGCCTG    |
| PtrTCP16-qR                  | AGCCACTCAATGGTCTCACC    |
| PtrTCP17-qF                  | GCGAACAGGGAAGAAGGACA    |
| PtrTCP17-qR                  | TGCTTTAICGAAAGCCGAGCA   |
| PtrTCP18-qF                  | GATACAACAGCACCCAAAAGAGA |
| PtrTCP18-qR                  | TGTGGGAATTTCTCAATGGC    |
| PtrTCP19-qF                  | TGGTGGAAAAGATCGGCACA    |
| PtrTCP19-qR                  | CAACCGATCTTGAGGTCGT     |
| PtrTCP20-qF                  | GTGGAGGAAGTGCAGGACTC    |

---

|             |                          |
|-------------|--------------------------|
| PtrTCP20-qR | CGGGTCTATCCAAGCACGAA     |
| PtrTCP21-qF | CGTACTCCAGAGGGCATGAT     |
| PtrTCP21-qR | TCTGAGAATTGATGCTCCTGAT   |
| PtrTCP22-qF | CGAGTGCTAGTACTGGTGGC     |
| PtrTCP22-qR | ACGCAAGCCAGTCATCTCAA     |
| PtrTCP23-qF | CCTGTGCTAATGCCTGTCGAT    |
| PtrTCP23-qR | GAAGTAGTGCAGACATGGGACA   |
| PtrTCP24-qF | GAGCTCTTTCGGCTCAACTCT    |
| PtrTCP24-qR | ATTGTGGGTTTGACAGCAATAG   |
| PtrTCP25-qF | GGTGATTGGCAGGTACAAACC    |
| PtrTCP25-qR | TCATGCTCGCATCTTCTCCA     |
| PtrTCP26-qF | TGAAGCTGAAGTGCCGTTCT     |
| PtrTCP26-qR | TGAATGATICTCTTGAGGAATCCA |
| PtrTCP27-qF | GATGGGCAGGTGCAAAACAG     |
| PtrTCP27-qR | CGGGACCTGTCCAGTAGTA      |
| PtrTCP28-qF | AGGGAGTAGTGTGGTGTG       |
| PtrTCP28-qR | AGTACTTGATCCGGCCAAT      |
| PtrTCP29-qF | ATGTGCTGGTCTGAAG         |
| PtrTCP29-qR | GTGCACCTTCTGATGCCGTT     |
| PtrTCP30-qF | GTTGCTACCAACCCTGCT       |
| PtrTCP30-qR | AGTCTCGTCCAGCTAATCC      |
| PtrTCP31-qF | CACCTGGTACAACACAGTCT     |
| PtrTCP31-qR | AACTGATGGTATGGACTCG      |
| PtrTCP32-qF | CATCTGCAACAATGGTTATCA    |
| PtrTCP32-qR | AGTTGTAITTTCTGTAGACGGA   |
| PtrTCP34-qF | AAAGGGCAGTGTGTTGGGG      |
| PtrTCP34-qR | TACCCACCACTCTACCCAC      |
| PtrTCP35-qF | TGCTGTACACGTGCTGAT       |
| PtrTCP35-qR | GCAGACATAAACGGCTCTTTGG   |
| PtrTCP36-qF | GTGCACAGAGGAAGTAGAGGA    |
| PtrTCP36-qR | ATCCGGTGTCAAAACTGCCT     |

***P. euphratica***

|           |                                |
|-----------|--------------------------------|
| PeuTCP3F  | AGATCTATGGAGCGGAGGAGATTGAG     |
| PeuTCP3R  | GCTAGCTCAGTCTTCCCTTTGCCCTTC    |
| PeuTCP4F  | AGATCTATGTTTCCATTAAGCTACAATGCC |
| PeuTCP4R  | ACTAGTTCAAGGGTGGTCAGAGAGATG    |
| PeuTCP5F  | AGATCTATGTCAGATAACAGTGGTGTCTGT |
| PeuTCP5R  | ACTAGTTCAACGCTGATCCTCCTCTC     |
| PeuTCP6F  | AGATCTATGGCTTCTGAAACGGTCTCTA   |
| PeuTCP6R  | ACTAGTCTACATCTTAIGCTCCCCAGTTA  |
| PeuTCP8F  | AGATCTATGGAAGGAGGTGATGATCAGC   |
| PeuTCP8R  | ACTAGTTTAAAACTAATGGCATAAATCGA  |
| PeuTCP11F | AGATCTATGGGAGAGGCCACCACCA      |
| PeuTCP11R | ACTAGTTCAATGGCGAGAATCAGAGGAAG  |

---

---

|           |                                  |
|-----------|----------------------------------|
| PeuTCP12F | AGATCTATGGATCCAAGGGCTCTAAC       |
| PeuTCP12R | ACTAGTTCAGTCCCTGATCCTTGTG        |
| PeuTCP21F | AGATCTATGGCATCGACACAAAAGCAG      |
| PeuTCP21R | ACTAGTTC AAGATCGAGACATGAACTGT    |
| PeuTCP27F | AGATCTATGATTACTAGTTC AAGCAAGTGG  |
| PeuTCP27R | TCTAGATCATTACAAGGGAATTGTGGGT     |
| PeuTCP29F | AGATCTATGAAGAACACCGGAGGAGA       |
| PeuTCP29R | ACTAGTTC AATTCTGAGAATTGGAGAAGAGG |
| PeuTCP33F | AGATCTATGGAAGGAGGTGATGATCAGT     |
| PeuTCP33R | ACTAGTTTATGAGTGATGACTCGTTGT      |
| PeuSPL8F  | AGCAGCTCTCTCCCTATGGT             |
| PeuSPL8R  | GGGTTTGCCTCTCTTGCCTA             |
| PeuSPL6F  | CGTCAATGGACTGCAGCAAC             |
| PeuSPL6R  | TGTGCCCTGCTAAACGTCTC             |
| PeuSPL17F | CGCCTAGCTGGCCATAATGA             |
| PeuSPL17R | CTCAGAAGACCTTGGAGCGG             |
| PeuSPL23F | TGGTGGTAGTGGTAGGTCGT             |
| PeuSPL23R | ACTCAGATAAATCATGGAACCTGC         |
| PeuSPL27F | CACTAGTGTGGTGGAGAGCG             |
| PeuSPL27R | GGACCCGTCACCTGCATAAA             |

---

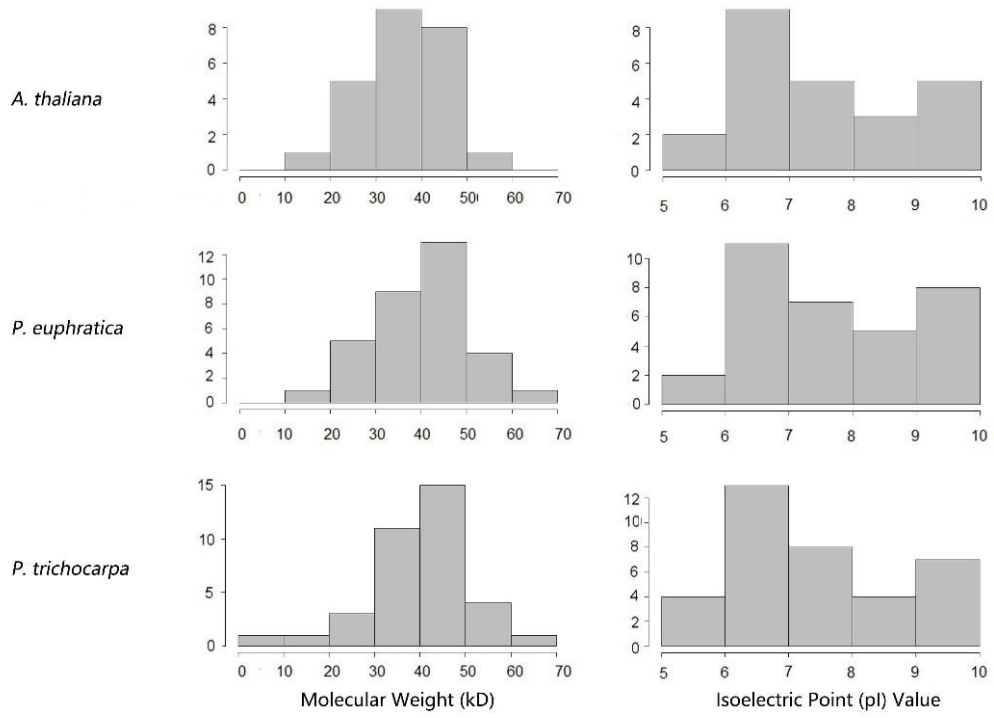

Supplementary Figure S1. Distribution of Molecular weight and isoelectric point of TCP proteins from *Arabidopsis*, *P. euphratica* and *Populus trichocarpa*.

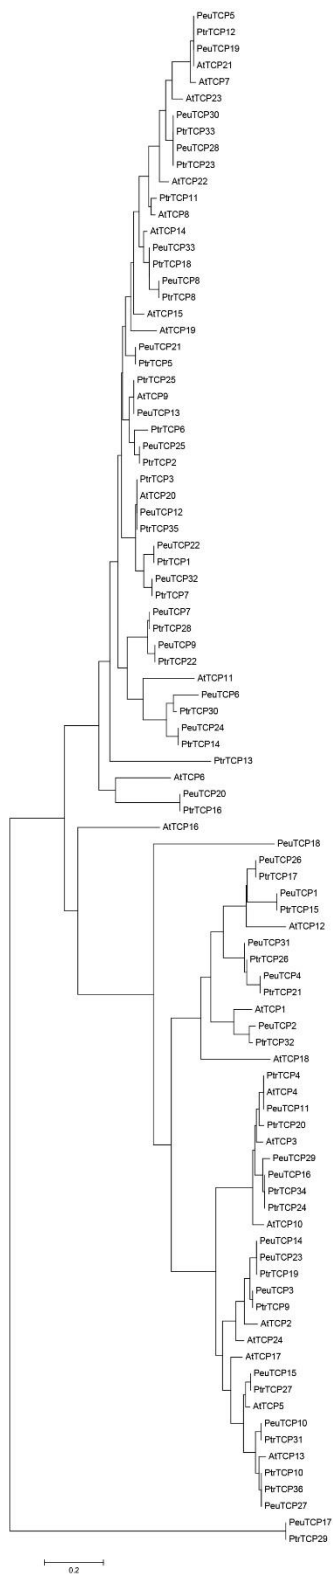

Supplementary Figure S2. Phylogenetic tree of TCPs built with the minimal evolution method



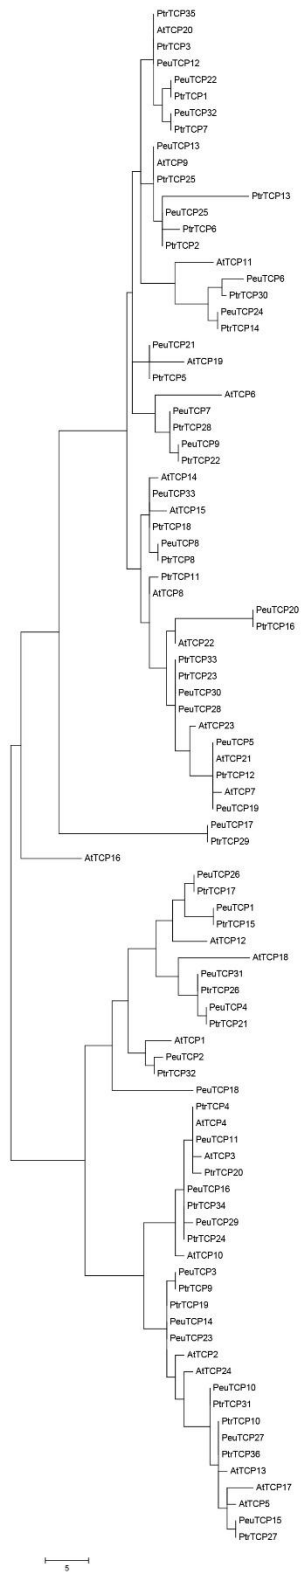

Supplementary Figure S3. Phylogenetic tree of TCPs built with the maximal parsimony method

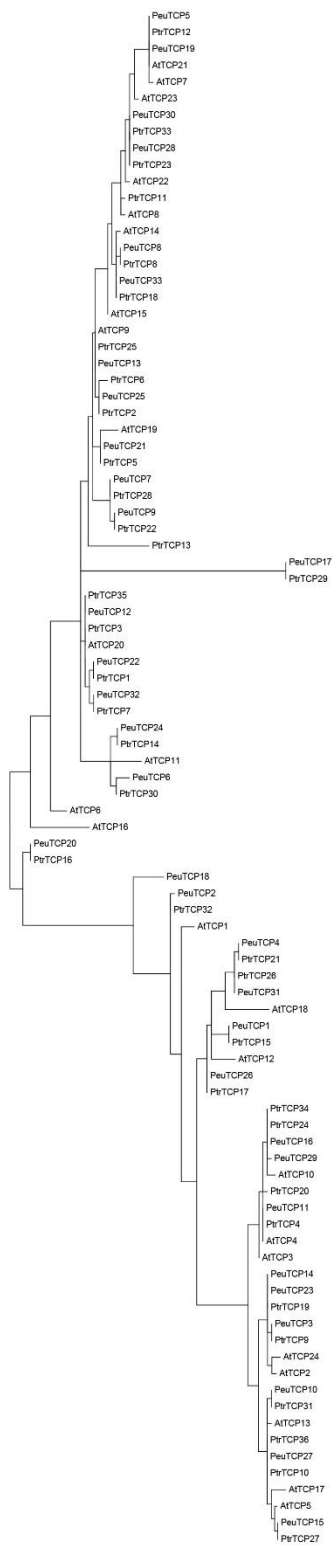

Supplementary Figure S4. Phylogenetic tree of TCPs built with the neighbour-joining method

| Motif | Width | Best possible match                                                                                                                                                                  |
|-------|-------|--------------------------------------------------------------------------------------------------------------------------------------------------------------------------------------|
| 1     | 57    | KDR TKVGRRRRIN ALCAARIFQLTRFLKSDGTIEVLLQ AE AIIAATDT                                                                                                                                 |
| 2     | 71    | RIVRYRAFQKGRSEKVTIRLRORVPLSV TAIQFILLQORLTDQ SEVVWLLAAK EIDEL                                                                                                                        |
| 3     | 145   | WGRILAHIN ISQSTFTLLTNGISVYNNNSNNNNNTAN TQ DENLFGAAAARQV ST MCFQSLLP SSSRSTSSFP QIQQLNSI QNTNSI PCVSHEN QQLQ F FVSD LI VAATTOVA                                                       |
| 4     | 159   | NVLRSSAITSA ASKSA LSPQGLAFDANGASETREANASDMLFQLQ QLVYSDGN HRTTFREDLPEKETTQQQSTETTEASNSAKSHA PQGRTASIR ATNML T MYATA AATTNONTFVNL PGGAT AAAYQE QMVF                                    |
| 5     | 159   | FN NFGSLQGRSKSLF QILLETSSQPTFLSPQSSMLNANRQARQLRQSSSLSTETTESFWRRER EQQLS SQQ QM WLLQSSSAI ASQI ANFVVLANSRQVQVSDIVTF SVWNSVYRRTNSSL FPNF A VILL SQQLE                                  |
| 6     | 71    | SSIL KVFQFEP NTRMLNSFQWQQLGLEL LSGDQI MLN QALN FQQQVQEVYLN                                                                                                                           |
| 7     | 95    | IKNNIPATQTDI KLVVY LSSALSLS SQILVCPPTTQSF S ATASNEID RQIN FQWLT STQRLH NSLT S YLISQ NR SQI                                                                                           |
| 8     | 126   | QILPEISA VDFDANF RRMVAVSHQTHADRVAQVFPNPLT QAMLAQSAFSQRQLSSP SIRAVNOL MASTDHRQDF QSLIPSRFVSDLA PSI ARIQDE NVYSOR                                                                      |
| 9     | 21    | AKESREKARRARRRKKMC                                                                                                                                                                   |
| 10    | 21    | DTI ATANSVWTLKI TDTM                                                                                                                                                                 |
| 11    | 41    | SSNSACTVSTTCVDTT QMLRQFSLIITQQLQFNR                                                                                                                                                  |
| 12    | 59    | NVIDWETSFTR NFWADAILRAKSEVYTD VYKKNVAKRQBEKEDNIBUNTA                                                                                                                                 |
| 13    | 80    | GGCRVYVY VQLSMVQQQV ANQCLLQIHSNNMILQVNTSCKRW L MLE NQEKQ YSDQDEN NVQ                                                                                                                 |
| 14    | 25    | ADE V KKKKKR CSEVYVREAV                                                                                                                                                              |
| 15    | 29    | KAEIKDQIMIAKQKQKOLA KRSSN                                                                                                                                                            |
| 16    | 159   | YTCVLDATNS ETDQLQVYASADVYQEVVRLAKFAKRV LVMVVERA QILSTMLFQSLRCLQ EKLIQTASR SALWBSSEKSTL T VETSIHQQLICVONRL LLRTELDRQVEI CA TADA EIVRASNT IALDSCFY                                     |
| 17    | 200   | MLKRFVSSITLPEENLASRQIINSKYVYDREKSN LLQND VSIIDKFFITNS RSSSIFQFSEIEV S ATLEKDFSP F LKVVYTRVQ KINAL NQKL S VVQAGN VYVWTF ALQQLSTRIMTILNA VRES NSAPNNM W NQGN ISILKTTTAINWQPSSS IPARDRL |
| 18    | 29    | MEHDFQLQLCYDTR SQQRKX                                                                                                                                                                |
| 19    | 41    | HTYHHRNF POLLEKEDI CSSSS YSL ISTTB D                                                                                                                                                 |
| 20    | 159   | MEEFANAAKQVKKR R LIVAQAKVRIEM AICS ATRIKQELLSQDAI WLVR VR DLI V ET TKKSSKQI ETQSDV K ACNAS DQIM AIDFL TAQV AARS VYATVQASTVFPDT ATLEKARLLAQ                                           |

Supplementary Figure S5. Protein motifs identified by MEME

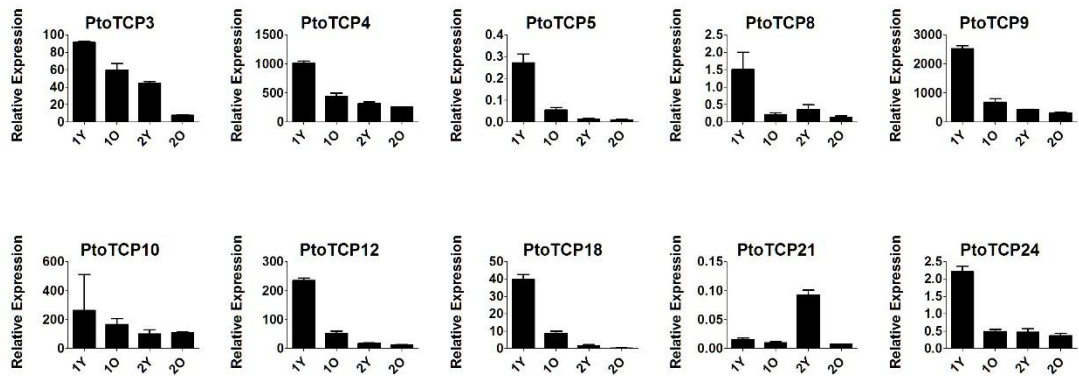

Supplementary Figure S6. Expression pattern of selected TCP genes in *P. tomentosa* leaves. Each bar represents three biological replicates and error bar represents S.D.

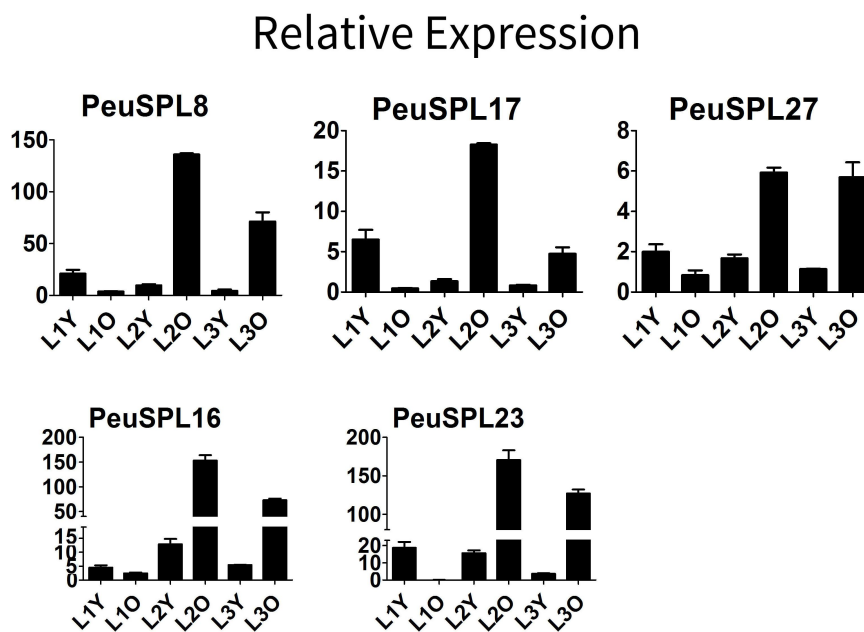

Supplementary Figure S7. Expression pattern of selected SPL genes in *P. euphratica*. Each bar represents three biological replicates and error bar represents S.D.

## Reference

- Li, C. & Lu, S. Molecular characterization of the SPL gene family in *Populus trichocarpa*. *BMC Plant Biology* **14**, 1 (2014).
